# Supplementary material for: New binuclear copper(ii) coordination polymer based on mixed pyrazolic and oxalate ligands: structural characterization and mechanical properties
Source: Royal Society of Chemistry journal article supplement (doi:10.1039/c5ra04028k), 2015-01-01

## **Supporting Information**

# **New binuclear Copper(II) Coordination Polymer based on Mixed Pyrazolic and Oxalate Ligands: Structural Characterization and Mechanical Properties**

**Adaris M. López-Marzo, Miguel Guerrero, Teresa Calvet, Mercè Font-Bardia,  
Eva Pellicer, Maria Dolors Baró, Josefina Pons and Jordi Sort.**

**Fig. S1. Indexing faces of the measured crystal**

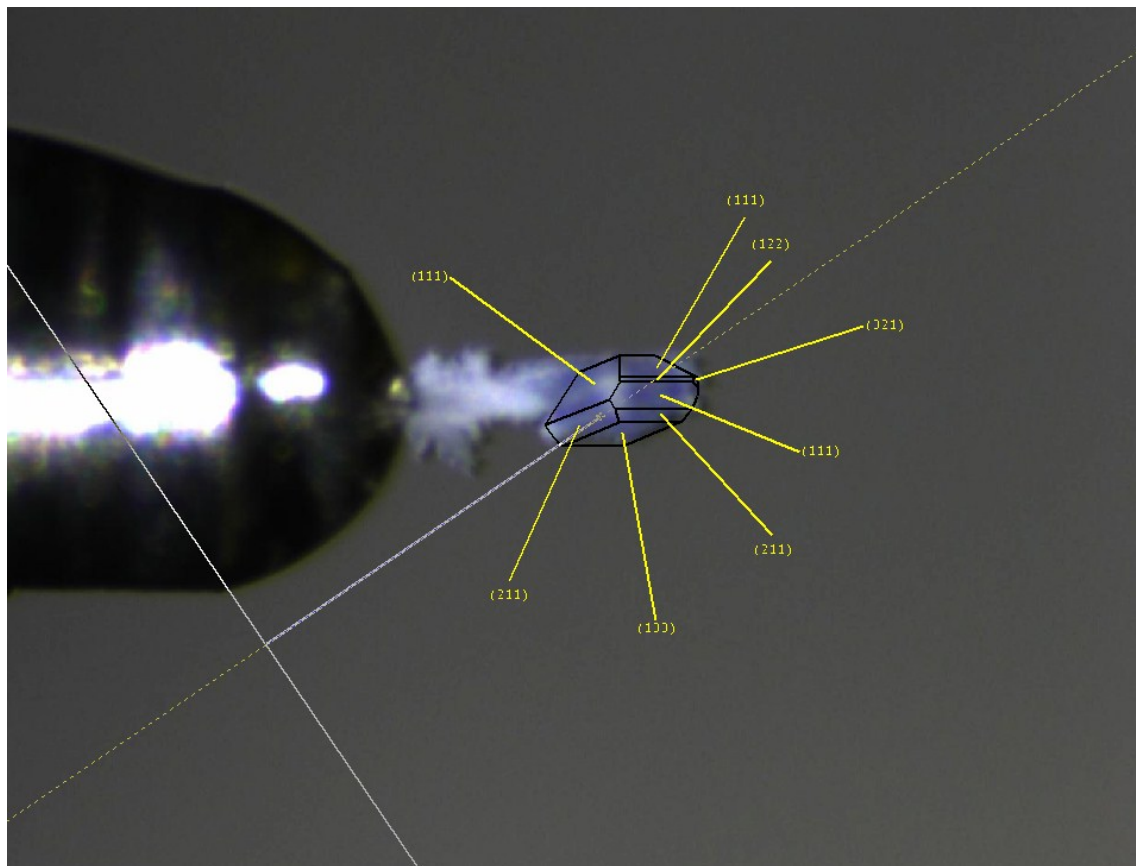

Supplement: c5ra04028k1.pdf [file c5ra04028k1.pdf]
